# Supplementary material for: Integrative investigation of lipidome and signal pathways in human endothelial cells under oxidative stress
Source: Royal Society of Chemistry journal article supplement (doi:10.1039/c1mb00002k), 2011-05-23
Supplement: c1mb00002k.pdf [file c1mb00002k.pdf]

## Supplementary Material

### Experimental

#### *In Vivo* PLA Assay

EA. hy926 cells were seeded onto 100 mm culture plates at a density of  $2 \times 10^6$  cells per plate and grown into confluence before use. Cells were preincubated for 2 h with 1 ml liposomes suspension and induced by 0.2 mM  $H_2O_2$  for 0 h and 1 h, respectively. The liposomes suspension was prepared as published protocols<sup>1</sup>. Briefly, the bis-BODIPY-PC, a molecular probe providing a continuous fluorescence response to PLA action, and PS16:0/16:0 at a molar ratio of 1:9 were dissolved in chloroform and dried under gentle stream of nitrogen, then desiccated overnight. The dried film of lipids was rehydrated in PBS at a concentration of 1  $\mu$ M of bis-BODIPY-PC and sonicated for 30 min on ice. Liposomes were used immediately after preparation. Treated cells were added with a volume of 2 ml chloroform/methanol (v/v=2/1, 0.01% BHT) and a volume of 1 ml 1 M KCl, mixed well and centrifuged ( $2,000 \times g$ , 4 °C, 5 min). The organic layer was then recovered and dried under gentle nitrogen stream and redissolved in 100  $\mu$ l chloroform (0.01% BHT) for thin layer chromatography (TLC) analysis as previously described<sup>2</sup>. The resulting samples were spotted onto a TLC plate (Merck silica gel 60) in a solvent system of chloroform/methanol/water (v/v/v=65/25/4). Intensities of fluorescent BODIPY-LPC were semi-quantified by a UVP imaging system with the LabWorks 4.6 software (UVP Products, Upland, CA, USA). PLA activity was assayed by the formation of BODIPY-LPC and expressed as the fold of control.

### References

1. T. Meshulam, H. Herscovitz, D. Casavant, J. Bernardo, R. Roman, R. P. Haugland, G. S. Strohmeier, R. D. Diamond and E. R. Simons, *The Journal of biological chemistry*, 1992, **267**, 21465-21470.
2. G. F. Scherer, R. U. Paul, A. Holk and J. Martinec, *Biochemical and Biophysical Research Communications*, 2002, **293**, 766-770.

### Figures

(A) MS<sup>1</sup> of PI/PS

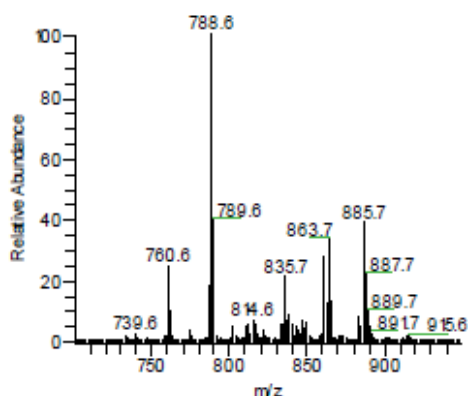

(C) MS<sup>2</sup> of PS34:2, m/z 760

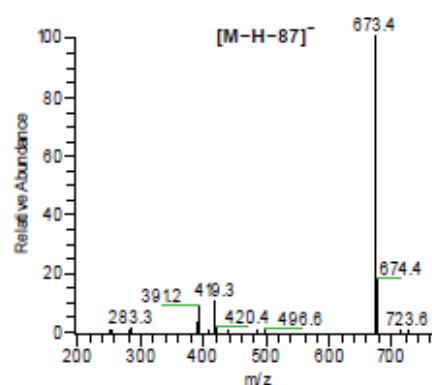

(B) MS<sup>2</sup> of PI34:2, m/z 833

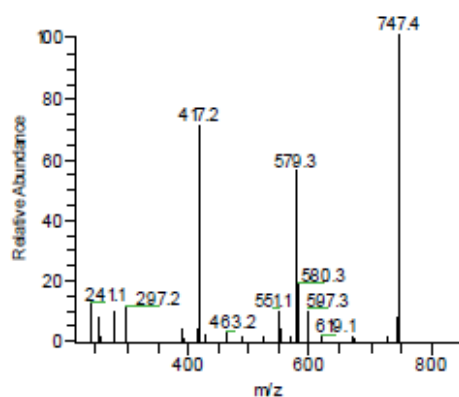

|              |         |                                                                      |
|--------------|---------|----------------------------------------------------------------------|
| PS 16:0/18:1 | m/z 391 | [M-88-C <sub>17</sub> H <sub>33</sub> COOH] <sup>-</sup>             |
| PS 18:0/16:1 | m/z 419 | [M-88-C <sub>16</sub> H <sub>29</sub> COOH] <sup>-</sup>             |
| PI 16:0/18:2 | m/z 255 | [C <sub>16</sub> H <sub>31</sub> COO] <sup>-</sup>                   |
|              | m/z 577 | [M-H <sub>2</sub> O-C <sub>16</sub> H <sub>31</sub> CO] <sup>-</sup> |
|              | m/z 279 | [C <sub>17</sub> H <sub>31</sub> COO] <sup>-</sup>                   |
|              | m/z 553 | [M-H <sub>2</sub> O-C <sub>17</sub> H <sub>31</sub> CO] <sup>-</sup> |
| PI 18:1/16:1 | m/z 281 | [C <sub>17</sub> H <sub>33</sub> COO] <sup>-</sup>                   |
|              | m/z 551 | [M-H <sub>2</sub> O-C <sub>17</sub> H <sub>33</sub> CO] <sup>-</sup> |
|              | m/z 253 | [C <sub>16</sub> H <sub>29</sub> COO] <sup>-</sup>                   |
|              | m/z 579 | [M-H <sub>2</sub> O-C <sub>16</sub> H <sub>29</sub> CO] <sup>-</sup> |

**Fig. S1.** Negative-ion MS<sup>n</sup> analysis of PI and PS molecular species from EA.hy926 cells. (A) Averaged MS<sup>1</sup> spectrum of PI/PS. (B) MS<sup>2</sup> spectrum of PI34:2. (C) MS<sup>2</sup> spectrum of PS34:2. Featured fragment ions of PI34:2 and PS34:2 are listed.

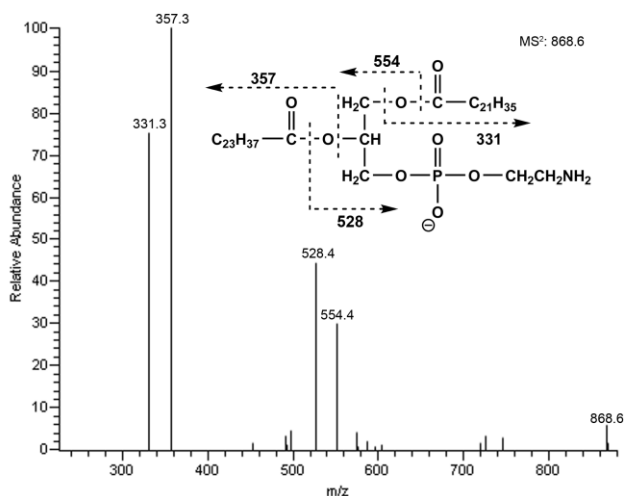

**Fig S2.** The MS<sup>2</sup> analysis of PE46:9 (m/z 868.6) as illustration of qualitative identification of long chain polyunsaturated fatty acid containing phospholipids. The MS<sup>2</sup> fragment ions m/z 331.3, 357.3, 528.4 and 554.4 were corresponding to [C<sub>21</sub>H<sub>35</sub>COO]<sup>-</sup>, [C<sub>23</sub>H<sub>37</sub>COO]<sup>-</sup>, [M-C<sub>23</sub>H<sub>37</sub>CO]<sup>-</sup> and [M-C<sub>21</sub>H<sub>35</sub>CO]<sup>-</sup>, respectively.

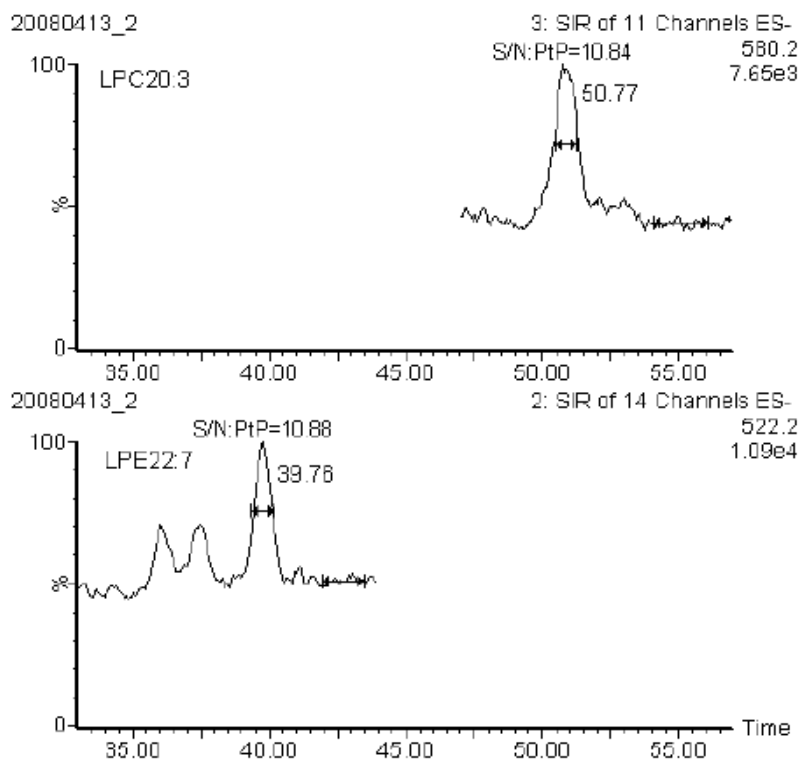

**Fig. S3.** Extracted ions chromatographs of LPC 20:3 and LPE 22:7 in EA.hy926 cells. The S/N:PtP (signal to noise ratio: peak to peak) were 10.84 and 10.88, respectively.

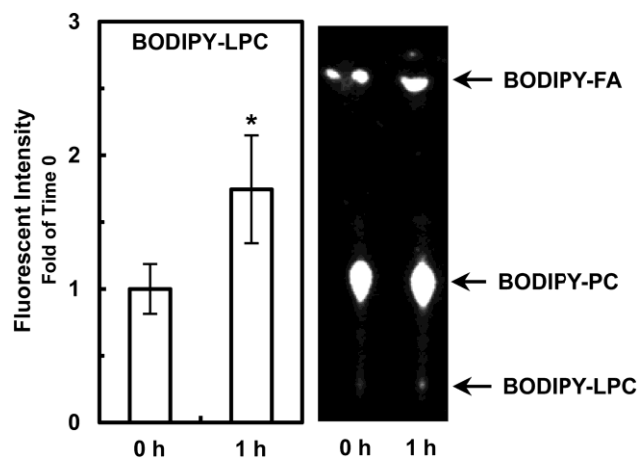

**Fig. S4** TLC assay of *in vivo* PLA activity. Cells were treated by 0.2 mM H<sub>2</sub>O<sub>2</sub> for 0 h and 1 h. The bis-BODIPY-PC was attached by fluorescent substituent to each of its fatty acid chains and provided a continuous fluorescence response to PLA. The PLA activity was expressed by normalizing the formation of fluorescent BODIPY-LPC of time 1 h to that of time 0. \**P* < 0.05, compared with time 0.

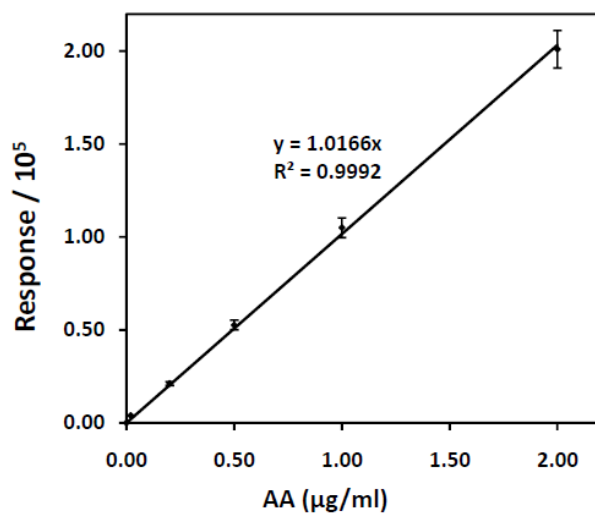

**Fig. S5.** The external standard calibration curve of AA ranging from 0.02 to 2 µg. The equation of standard curve was  $y=1.0166x$ ,  $R^2=0.9992$ .

**Table S1** The carboxylates assignment of phospholipids in EA.hy926 cells.

| <i>a</i> No. | <i>b</i> <i>sn-1/sn-2</i> | No. | <i>sn-1/sn-2</i>       | No. | <i>sn-1/sn-2</i>      | No. | <i>sn-1/sn-2</i>      |
|--------------|---------------------------|-----|------------------------|-----|-----------------------|-----|-----------------------|
|              | <b>PG</b>                 |     | 18:0e/24:6,            | 127 | 18:0e/18:0            | 191 | 20:0e/20:4            |
| 001          | 16:0/16:0,14:0/18:0       | 066 | 20:1e/22:5,22:2e/20:4  | 128 | 16:1/20:4,18:2/18:3   | 192 | 18:0e/22:3,18:1e/22:2 |
| 002          | 16:0/18:2,16:1/18:1       |     | 18:1e/24:4,            | 129 | 16:0/20:4,            | 193 | 18:0e/22:2,18:1e/22:1 |
| 003          | 16:0/18:1,16:1/18:0       | 067 | 20:1e/22:4,22:1e/20:4  | 130 | 18:1/18:3,18:2/18:2   | 194 | 18:2/22:6,18:1/22:7   |
| 004          | 16:0/18:0                 |     | 18:0e/24:4,            | 131 | 16:1/20:2,18:1/18:2   | 195 | 18:1/22:6             |
| 005          | 16:1/20:3,18:2/18:2       | 068 | 20:1e/22:3,22:0e/20:4  | 132 | 18:1/18:1,18:0/18:2   | 196 | 18:0/22:6,20:2/20:4   |
| 006          | 16:0/20:3,18:1/18:2       | 069 | 20:4/22:6,20:1e/22:2   | 133 | 18:0/18:1             | 197 | 18:1/22:4,20:1/20:4   |
| 007          | 18:0/18:2,18:1/18:1       |     | 20:3/22:6,22:4/20:5,   | 134 | 16:0e/22:6,18:1e/20:5 | 198 | 18:0/22:4,            |
| 008          | 18:0/18:1                 | 070 | 20:0e/22:2,20:1e/22:1  | 135 | 16:1e/22:4,           | 199 | 18:1/22:3,20:0/20:4   |
| 009          | 18:0/18:0                 | 071 | 20:2/22:6,22:4/20:4,   |     | 18:0e/20:5,18:1e/20:4 | 200 | 18:0/22:3,20:1/20:2   |
|              | <b>PE</b>                 |     | 20:0e/22:1,20:1e/22:0  | 136 | 16:0e/22:4,           | 201 | 18:0/22:2,            |
| 010          | 16:1e/16:1                | 072 | 20:1/22:6,22:4/20:3,   | 137 | 18:0e/20:4,18:1e/20:3 | 202 | 20:1/20:1,20:0/20:2   |
| 011          | 16:0e/16:1,16:1e/16:0     |     | 22:2/20:5,20:0e/22:0   | 138 | 16:1e/22:2,           | 203 | 18:0/22:1,            |
| 012          | 16:0e/16:0                | 073 | 20:0/22:6,20:2/22:4,   | 139 | 18:0e/20:3,18:1e/20:2 | 204 | 18:1/22:0,20:0/20:1   |
| 013          | 14:0/18:2,16:1/16:1       |     | 20:4/22:2,20:5/22:1    | 140 | 16:1e/22:1,18:1e/20:1 | 205 | 18:0/22:0             |
| 014          | 14:1/18:0,16:0/18:1       | 074 | 20:1/22:4,20:3/22:2,   | 141 | 16:1/22:4,18:1/20:4   | 206 | 20:1/22:3             |
| 015          | 16:0/16:0,14:0/18:0       |     | 20:4/22:1,20:5/22:0    | 142 | 16:1/22:3,18:1/20:3   | 207 | 20:1/22:2             |
|              | 16:2e/18:1,               | 075 | 20:0/22:4,20:2/22:2,   | 143 | 16:0/22:3,18:1/20:2   | 208 | 20:1/22:1,18:0/24:2   |
| 016          | 16:1e/18:2,18:2e/16:1     |     | 20:3/22:1,20:4/22:0    | 144 | 16:0/22:2,18:1/20:1   | 209 | 20:0/22:1,20:1/22:0   |
| 017          | 16:1e/18:1,18:1e/16:1     | 076 | 20:1/22:2,             | 145 | 16:0/22:1,18:1/20:0   | 210 | 20:0/22:0             |
| 018          | 16:0e/18:1,18:1e/16:0     |     | 20:2/22:1,20:3/22:0    | 146 | 18:0/20:0,18:1e/22:6  | 211 | <b>PS</b>             |
| 019          | 16:0e/18:0,18:0e/16:0     | 077 | 20:0/22:2,             | 147 | 18:0/20:0,18:1e/22:6  | 212 | 16:1/18:1             |
| 020          | 16:1/18:2                 |     | 20:1/22:1,20:2/22:0    | 148 | 18:0e/22:6            | 213 | 16:0/18:1,18:0/16:1   |
| 021          | 16:0/18:2,18:1/16:1       | 078 | 20:0/22:1,20:1/22:0    | 149 | 20:1e/20:4            | 214 | 16:0/18:0             |
| 022          | 16:0/18:1,18:0/16:1       | 079 | 20:0/22:0              | 150 | 20:5/20:6,            | 215 | 18:0/18:2,18:1/18:1   |
| 023          | 16:0/18:0                 |     | 18:1e/26:5,            | 151 | 18:0e/22:4,20:0e/20:4 | 216 | 18:0/18:1             |
| 024          | 16:1e/20:5                | 080 | 22:1e/22:5,24:2e/20:4  | 152 | 18:1e/22:2,20:1e/20:2 | 217 | 18:0/18:0             |
| 025          | 16:1e/20:4                |     | 18:0e/26:5,22:0e/24:5, | 153 | 20:5/20:4,18:1e/22:1  | 218 | 18:0/20:4,18:1/20:3   |
| 026          | 16:0e/20:4,16:1e/20:3     | 081 | 22:1e/22:4,24:1e/20:4  | 154 | 20:4/20:4,20:1e/20:0  | 219 | 18:0/20:3,18:1/20:2   |
| 027          | 16:0e/20:3,16:1e/20:2     | 082 | 22:5/22:6              | 155 | 20:3/20:4,20:0e/20:0  | 220 | 18:0/20:2,18:1/20:1   |
| 028          | 18:1e/18:1,16:1e/20:1     | 083 | 22:4/22:6              | 156 | 18:0/22:6             | 221 | 16:1/22:0,            |
| 029          | 16:0e/20:1,18:0e/18:1     | 084 | 22:3/22:6              | 157 | 18:1/22:4,20:1/20:4   | 222 | 18:0/20:1,18:1/20:0   |
| 030          | 16:0e/20:0,18:0e/18:0     | 085 | 22:2/22:6,22:4/22:4    | 158 | 18:1/22:3,20:0/20:4   | 223 | 18:0/22:4             |
| 031          | 16:1/20:5,16:2/20:4       | 086 | 22:1/22:6              | 159 | 18:1/22:2,20:1/20:2   | 224 | 18:0/22:3             |
| 032          | 16:0/20:5,16:1/20:4       | 087 | 22:0/22:6,22:2/22:4    | 160 | 18:0/22:2,            | 225 | 18:0/22:2,18:1/22:1   |
| 033          | 16:0/20:4,16:1/20:3       | 088 | 22:1/22:4              | 161 | 20:0/20:2,20:1/20:1   | 226 | 16:0/24:1,20:0/20:1   |
| 034          | 16:0/20:3,18:1/18:2       | 089 | 22:0/22:4,22:2/22:2    | 162 | 18:0/22:1,            | 227 | 18:0/22:0             |
| 035          | 18:1/18:1,18:0/18:2       | 090 | 22:1/22:2              | 163 | 18:1/22:0,20:0/20:1   | 228 | 18:1/24:2             |
| 036          | 18:0/18:1                 | 091 | 22:0/22:2,22:1/22:1    | 164 | 18:0/22:0,            | 229 | 18:1/24:1             |
| 037          | 16:0/20:0,18:0/18:0       | 092 | 22:0/22:1              | 165 | 20:0/20:0,20:1e/22:6  | 230 | 18:0/24:1             |
| 038          | 16:0e/22:6,18:1e/20:5     | 093 | 22:0/22:0              | 166 | 20:0e/22:6            | 231 | <b>LPE</b>            |
| 039          | 18:1e/20:4                | 094 | 22:0/24:6              | 167 | 22:1e/20:4            | 232 | <sup>c</sup> 16:1e/H  |
|              | 16:0e/22:4,16:1e/22:3,    | 095 | 24:2/22:3,24:1/22:4    | 168 | 20:5/22:6,20:0e/22:4  | 233 | 18:2e/H               |
| 040          | 18:0e/20:4,18:1e/20:3     | 096 | 22:5/24:6              | 169 | 22:0e/20:3            | 234 | 18:1e/H               |
| 041          | 16:0e/22:3,18:0e/20:3     | 097 | 22:4/24:6              | 170 | 18:1/24:8             | 235 | 18:1/H                |
|              | 20:1e/18:1,18:1e/20:1,    | 098 | 22:4/24:5              | 171 | 20:1/22:4             | 236 | 18:0/H                |
| 042          | 16:0e/22:2,16:1e/22:1     | 099 | 22:4/24:4              | 172 | 20:0/22:4             | 237 | 20:4/H                |
| 043          | 16:0e/22:1,18:1e/20:0     | 100 | 22:3/24:4              | 173 | 20:1/22:2             | 238 | 20:3/H                |
| 044          | 18:1/20:6,20:0e/20:0      | 101 | 22:2/24:4              | 174 | <b>PI</b>             | 239 | 20:2/H                |
| 045          | 18:1/20:5                 | 102 | 22:1/24:4              | 175 | 16:0/16:1             | 240 | 22:7/H                |
| 046          | 18:1/20:4                 | 103 | 22:0/24:4              | 176 | 16:0/16:0             | 241 | 22:6/H                |
| 047          | 18:0/20:4,18:1/20:3       | 104 | 22:1/24:2              | 177 | 16:0/18:2,18:1/16:1   | 242 | 22:1/H                |
| 048          | 18:0/20:3,18:1/20:2       | 105 | 24:3/24:6              | 178 | 16:0/18:1,16:1/18:0   | 243 | 22:0/H                |
| 049          | 18:0/20:2,18:1/20:1       |     | <b>PC</b>              | 179 | 16:0/18:0             | 244 | 24:2/H                |
| 050          | 18:0/20:1,18:2e/22:6      | 106 | 14:0/16:1              | 180 | 16:0e/20:3,18:1e/18:2 | 245 | <b>PA</b>             |
| 051          | 18:0/20:0,18:1e/22:6      | 107 | 14:0/16:0              | 181 | 16:0e/20:2,18:0e/18:2 | 246 | 14:0/16:0             |
| 052          | 18:1e/22:5                | 108 | 14:1e/18:0             | 182 | 16:0e/20:1,18:0e/18:1 | 247 | 16:1/16:1             |
| 053          | 18:1e/22:4                | 109 | 14:0e/18:0             | 183 | 16:0e/20:0,18:0e/18:0 | 248 | 16:0/16:1             |
| 054          | 18:1e/22:3                | 110 | 16:1/16:1,14:1/18:1    | 184 | 16:0/20:4,            | 249 | 16:0/18:1             |
|              | 16:0e/24:3,18:1e/22:2,    | 111 | 16:0/16:1,14:1/18:0    | 185 | 16:1/20:3,18:2/18:2   | 250 | 18:1/18:1             |
| 055          | 18:0e/22:3,20:1e/20:2     | 112 | 16:0/16:0              | 186 | 16:0/20:3,            | 251 | 18:0/18:1             |
| 056          | 18:0e/22:2,20:1e/20:1     | 113 | 16:1e/18:3             | 187 | 16:1/20:2,18:1/18:2   | 252 | 18:0/20:4             |
| 057          | 18:0e/22:1,20:0e/20:1     | 114 | 16:0e/18:2,16:1e/18:1  | 188 | 18:1/18:1             | 253 | 18:0/20:3             |
|              | 18:1/22:6,                | 115 | 16:0e/18:1             | 189 | 18:0/18:1             | 254 | <b>LPC</b>            |
| 058          | 20:3/20:4,18:0e/22:0      | 116 | 16:0e/18:0             | 190 | 18:0/18:0             | 255 | 16:1/H                |
|              | 18:0/22:6,                | 117 | 16:0/18:3,16:1/18:2    | 191 | 18:0e/20:4            | 256 | 16:0/H                |
| 059          | 18:2/22:4,20:2/20:4       | 118 | 16:0/18:2,16:1/18:1    | 192 | 16:0e/22:3,18:0e/20:3 | 257 | 18:1/H                |
|              | 18:1/22:4,                | 119 | 16:0/18:1,18:0/16:1    | 193 | 18:1e/20:1            | 258 | 18:0/H                |
| 060          | 18:3/22:2,20:1/20:4       | 120 | 16:0/18:0              | 194 | 16:0e/22:1,18:0e/20:1 | 259 | 20:3/H                |
|              | 18:0/22:4,18:2/22:2,      | 121 | 16:1e/20:5             | 195 | 18:1/20:4             | 260 | 20:2/H                |
| 061          | 20:0/20:4,20:1/20:3       | 122 | 16:0e/20:5,16:1e/20:4  | 196 | 18:0/20:4,18:1/20:3   | 261 | 20:1/H                |
| 062          | 18:1/22:2,20:1/20:2       | 123 | 16:0e/20:4,18:1e/18:3  | 197 | 18:0/20:3             | 262 | 20:0/H                |

|     |                     |     |                       |     |                      |     |        |
|-----|---------------------|-----|-----------------------|-----|----------------------|-----|--------|
| 063 | 18:0/22:2,20:0/20:2 | 124 | 16:1e/20:2,18:1e/18:2 | 188 | 18:0/20:2            | 255 | 22:6/H |
| 064 | 18:0/22:1,20:0/20:1 | 125 | 16:0e/20:2,18:1e/18:1 | 189 | 18:0/20:1,18:1/20:0  |     |        |
| 065 | 18:0/22:0,20:0/20:0 | 126 | 16:0e/20:1,18:0e/18:1 | 190 | 18:0/20:0,20:3e/20:4 |     |        |

<sup>a</sup> The numbering is in the same order as that of Table 1. <sup>b</sup> All detected isobaric species are listed in the form of *sn-1/sn-2*. The *sn*-position determination is not unequivocal. <sup>c</sup> The letter "H" represents for the hydrogen atom.

**Table S2** The PC1 and PC2 values of the "outliers" in PCA-loading plot.

| Species        | PC1     | PC2     |
|----------------|---------|---------|
| PE36:6         | -0.1032 | 0.1234  |
| PE44:7         | -0.0608 | 0.1335  |
| PE44:5         | -0.0511 | 0.1186  |
| PE44:2         | -0.0731 | 0.1077  |
| PE44:0         | -0.0649 | 0.1303  |
| ePC34:3        | -0.1152 | 0.0526  |
| PC38:5         | -0.1223 | -0.0638 |
| PC40:11/e40:4  | 0.0300  | -0.0246 |
| ePC42:5        | -0.0841 | -0.1050 |
| PC42:5         | -0.0558 | -0.1206 |
| PI38:0/ePI40:7 | -0.1069 | 0.1133  |
| ePI40:4        | -0.1064 | 0.0507  |
| PI40:2         | -0.0817 | 0.0822  |
| eLPE18:2       | 0.1014  | 0.0129  |
| eLPE18:1       | 0.1396  | 0.0371  |
| LPE18:1        | 0.1797  | -0.0126 |
| LPE18:0        | 0.1514  | 0.0420  |
| LPE20:4        | 0.1968  | 0.0136  |
| LPE20:3        | 0.1834  | 0.0021  |
| LPE22:1        | 0.1857  | 0.0250  |
| LPE22:0        | 0.1980  | -0.0302 |
| LPC16:1        | 0.1982  | 0.1341  |
| LPC16:0        | 0.1924  | 0.1959  |
| LPC18:1        | 0.1759  | 0.1669  |
| LPC18:0        | 0.1952  | 0.2365  |
| LPC20:2        | 0.1906  | 0.2495  |
| LPC20:1        | 0.1722  | 0.1037  |
| LPC20:0        | 0.1533  | 0.0352  |
